# Supplementary material
Source: MDPI journal article supplement (https://www.mdpi.com/2071-1050/14/9/4980)
Supplement: s1 [file s1]

**Table S1.** Ground truthing site names and their locations in Lake Burullus, Egypt. Latitude (N) and longitude (E) are presented in decimal degrees.

| Basin  | Direction | Site name        | Latitude (N) | Longitude (E) | Elevation<br>m asl |
|--------|-----------|------------------|--------------|---------------|--------------------|
| East   | North     | Burg El-Boghas   | 31.57667     | 30.98294      | 3                  |
|        |           |                  | 31.57521     | 30.98225      | 3                  |
|        |           |                  | 31.57493     | 30.98243      | 0                  |
|        | Middle    | El-Zawya         | 31.52855     | 30.95941      | -1                 |
|        |           |                  | 31.53082     | 30.96239      | 2                  |
|        |           | El-Medawara      | 31.49028     | 30.94149      | 8                  |
|        | South     | Drain 7          | 31.46035     | 30.95786      | 2                  |
|        |           |                  | 31.46106     | 30.95671      | 2                  |
|        |           |                  | 31.4622      | 30.95412      | 5                  |
|        |           |                  | 31.46278     | 30.94648      | 6                  |
| Middle | North     | El-Hanafy        | 31.52971     | 30.84392      | 2                  |
|        |           |                  | 31.53111     | 30.84472      | 3                  |
|        |           |                  | 31.53135     | 30.84446      | 2                  |
|        | Middle    | Besak            | 31.48186     | 30.85881      | 7                  |
|        |           |                  | 31.48022     | 30.85827      | 5                  |
|        |           |                  | 31.47841     | 30.8596       | 2                  |
|        | South     | El-Kom El-Akhdar | 31.45047     | 30.82456      | 3                  |
|        |           |                  | 31.44916     | 30.82435      | 0                  |
| West   | North     | El-Maksaba       | 31.46839     | 30.78438      | 2                  |
|        |           |                  | 31.49332     | 30.75717      | 2                  |
|        |           |                  | 31.48842     | 30.75842      | 2                  |
|        | South     | Shakhloba        | 31.40536     | 30.076006     | 5                  |
|        |           |                  | 31.40595     | 30.76107      | 3                  |
|        |           |                  | 31.40628     | 30.76171      | 3                  |

**Table S2.** Spectral and spatial characteristics for Landsat 5TM and 8OLI-TIRS images.

| Satellite | Sensor                         | Bands                                | Wavelength $\lambda$<br>( $\mu\text{m}$ ) | Spatial resolution (m) |
|-----------|--------------------------------|--------------------------------------|-------------------------------------------|------------------------|
| Landsat 5 | Thematic Mapper (TM)           | Band 1 - Blue                        | 0.45 - 0.52                               | 30                     |
|           |                                | Band 2 - Green                       | 0.52 - 0.60                               | 30                     |
|           |                                | Band 3 - Red                         | 0.63 - 0.69                               | 30                     |
|           |                                | Band 4 - Near-Infrared               | 0.76 - 0.90                               | 30                     |
|           |                                | Band 5 - Near-Infrared               | 1.55 - 1.75                               | 30                     |
|           |                                | Band 6 - Thermal                     | 10.40 - 12.50                             | 120                    |
|           |                                | Band 7 - Mid-Infrared                | 2.08 - 2.35                               | 30                     |
| Landsat 8 | Operational Land Imager (OLI)  | Band 1 - Coastal aerosol             | 0.43 - 0.45                               | 30                     |
|           |                                | Band 2 - Blue                        | 0.450 - 0.51                              | 30                     |
|           |                                | Band 3 - Green                       | 0.53 - 0.59                               | 30                     |
|           |                                | Band 4 - Red                         | 0.64 - 0.67                               | 30                     |
|           |                                | Band 5 - Near-Infrared               | 0.85 - 0.88                               | 30                     |
|           |                                | Band 6 - ShortWave InfraRed (SWIR) 1 | 1.57 - 1.65                               | 30                     |
|           |                                | Band 7 - ShortWave InfraRed (SWIR) 2 | 2.11 - 2.29                               | 30                     |
|           |                                | Band 8 - Panchromatic (PAN)          | 0.50 - 0.68                               | 15                     |
|           |                                | Band 9 - Cirrus                      | 1.36 - 1.38                               | 30                     |
|           | Thermal Infrared Sensor (TIRS) | Band 10 - TIRS 1                     | 10.6 - 11.19                              | 100                    |
|           |                                | Band 11 - TIRS 2                     | 11.5 - 12.51                              | 100                    |

**Table S3.** List of Landsat 5TM and 8OLI datasets downloaded from the GLOVIS website (<http://glovis.usgs.gov/>).

| Landsat | Date<br>(MM/DD/<br>YYYY) | Time of<br>satellite<br>overpass<br>(Central time) | Scene ID              | Temper<br>ature<br>(°C) | Dew<br>point<br>(°C) | Relative<br>humidity<br>(%) | Atmospheric<br>correction<br>module | Path/<br>Row | Data analyses<br>usage |
|---------|--------------------------|----------------------------------------------------|-----------------------|-------------------------|----------------------|-----------------------------|-------------------------------------|--------------|------------------------|
| 5 TM    | 7/28/1985                | 7:59:28                                            | LT51770381985209XXX07 |                         |                      |                             | T                                   | 177/3<br>8   | Long term              |
| 5 TM    | 7/21/2000                | 8:06:44                                            | LT51770382000203FUI00 | 27                      | 20                   | 66                          | T                                   | 177/3<br>8   | Long term              |
| 8 OLI   | 5/22/2013                | 8:31:41                                            | LC81770382013142LGN01 | 23                      | 19                   | 78                          | MLS                                 | 177/3<br>8   | Seasonal               |
| 8 OLI   | 6/7/2013                 | 8:31:41                                            | LC81770382013158LGN00 | 27                      | 18                   | 58                          | T                                   | 177/3<br>8   | Seasonal               |
| 8 OLI   | 6/23/2013                | 8:31:34                                            | LC81770382013174LGN00 | 26                      | 21                   | 74                          | MLS                                 | 177/3<br>8   | Seasonal               |
| 8 OLI   | 7/25/2013                | 8:31:37                                            | LC81770382013206LGN00 | 28                      | 19.5                 | 60                          | T                                   | 177/3<br>8   | Seasonal               |
| 8 OLI   | 8/10/2013                | 8:31:39                                            | LC81770382013222LGN00 | 28                      | 23                   | 74                          | T                                   | 177/3<br>8   | Seasonal               |
| 8 OLI   | 9/11/2013                | 8:31:39                                            | LC81770382013254LGN00 | 28                      | 20                   | 62                          | T                                   | 177/3<br>8   | Seasonal               |
| 8 OLI   | 9/27/2013                | 8:31:30                                            | LC81770382013270LGN00 | 25                      | 19                   | 69                          | MLS                                 | 177/3<br>8   | Seasonal               |
| 8 OLI   | 11/14/2013               | 8:31:21                                            | LC81770382013318LGN00 | 15                      | 15                   | 100                         | US                                  | 177/3<br>8   | Seasonal               |
| 8 OLI   | 7/28/2020                | 8:29:35                                            | LC81770382020210LGN00 | 28                      | 22                   | 70                          | T                                   | 177/3<br>8   | Long term              |

Temperature, dew point, and relative humidity were obtained from EL-Nouzha Airport Weather Station, Egypt.  
ENVI atmospheric correction module used as follows: MLS: Mid-Latitude Summer; T: Tropical; and US: US standard.
